# Supplementary material
Source: publisher site journal article supplement (http://kjim.org/upload/media/kjim-2023-363-Supplementary-Fig-2.pdf)
Supplement: Supplementary file 1 [file kjim-2023-363-Supplementary-Fig-2.pdf]

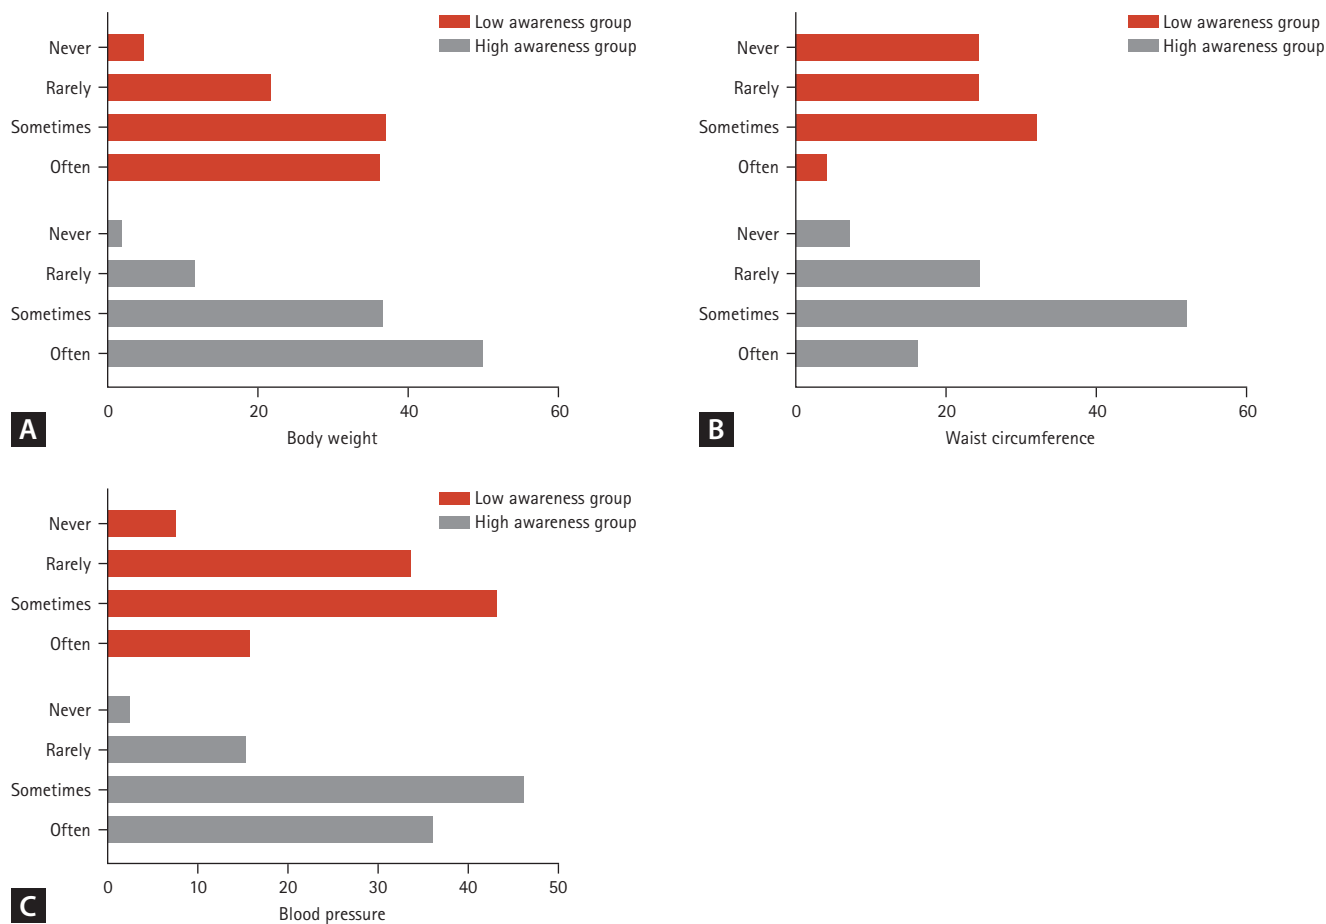

**Supplementary Figure 2.** Differences in health behaviors about metabolic syndrome. (A) Body weight. (B) Waist circumference. (C) Blood pressure.
